# Supplementary material for: Tracking Microbial Diversity and Hygienic-Sanitary Status during Processing of Farmed Rainbow Trout (Oncorhynchus mykiss)
Source: MDPI journal article supplement (doi:10.3390/foods12203718), 2023-10-10
Supplement: s1 [file s1]

**Table S1.** Mean, standard deviation (S.D.) and 95 % confidence intervals (log CFU/mL) for aerobic mesophilic bacteria (AMB), *Enterobacteriaceae*, lactic acid bacteria (LAB), total coliforms and sulfite-reducing *Clostridium* spp (SRC) in the water samples analyzed in the different processing areas.

| Sample           | Microorganism                            | Mean | S.D. | 95 % C.I.      |
|------------------|------------------------------------------|------|------|----------------|
| Input water      | Aerobic Mesophilic bacteria              | 2.96 | 0.68 | [2.45 - 3.47]  |
|                  | <i>Enterobacteriaceae</i>                | 1.12 | 0.89 | [0.46 - 1.78]  |
|                  | Lactic acid bacteria                     | 0.31 | 0.42 | [0 - 0.62]     |
|                  | Coliforms                                | 1.38 | 0.46 | [1.03 - 1.73]  |
|                  | Sulfite-reducing <i>Clostridium</i> spp. | 0.41 | 0.36 | [0.14 - 0.68]  |
| Output water     | Aerobic Mesophilic bacteria              | 4.23 | 0.62 | [3.76 - 4.70]  |
|                  | <i>Enterobacteriaceae</i>                | 2.56 | 1.24 | [1.64 - 3.48]  |
|                  | Lactic acid bacteria                     | 1.82 | 1.47 | [0.73 - 2.91]  |
|                  | Coliforms                                | 2.83 | 0.52 | [2.44 - 3.22]  |
|                  | Sulfite-reducing <i>Clostridium</i> spp. | 0.23 | 0.61 | [-0.22 - 0.68] |
| Processing water | Aerobic Mesophilic bacteria              | 0.31 | 0.58 | [-0.12 - 0.74] |
|                  | <i>Enterobacteriaceae</i>                | 0.24 | 0.64 | [-0.23 - 0.71] |
|                  | Lactic acid bacteria                     | 0.10 | 0.26 | [-0.10 - 0.30] |
|                  | Coliforms                                | ND * | ND   | ND             |
|                  | Sulfite-reducing <i>Clostridium</i> spp. | ND   | ND   | ND             |

\* ND: Not detected in the analyzed samples (< 1 CFU/mL).

**Table S2.** Mean, standard deviation (S.D.) and 95 % confidence intervals (log CFU/mL) for the aerobic mesophilic bacteria, *Enterobacteriaceae*, lactic acid bacteria, total coliforms, and sulphite-reducing *Clostridium* spp. counts in water according to the seasonal variations.

| Season | Microorganism                            | Mean | S.D. | C.I. (95 %)    |
|--------|------------------------------------------|------|------|----------------|
| Autumn | Aerobic Mesophilic bacteria              | 2.82 | 2.32 | [0.97 - 4.67]  |
|        | <i>Enterobacteriaceae</i>                | 0.94 | 1.60 | [-0.25 - 2.21] |
|        | Lactic Acid Bacteria                     | 0.58 | 0.75 | [-0.03 - 1.18] |
|        | Total coliforms                          | 1.57 | 1.52 | [0.36 - 2.78]  |
|        | Sulfite-reducing <i>Clostridium</i> spp. | ND * | ND   | ND             |
| Winter | Aerobic Mesophilic bacteria              | 2.36 | 1.78 | [0.94 - 3.78]  |
|        | <i>Enterobacteriaceae</i>                | 1.43 | 1.19 | [0.47 - 2.39]  |
|        | Lactic Acid Bacteria                     | 0.57 | 1.39 | [-0.54 - 1.68] |
|        | Total coliforms                          | 1.27 | 1.27 | [0.26 - 2.28]  |
|        | Sulfite-reducing <i>Clostridium</i> spp. | 0.15 | 0.25 | [-0.03 - 0.35] |
| Spring | Aerobic Mesophilic bacteria              | 2.38 | 1.46 | [1.21 - 3.55]  |
|        | <i>Enterobacteriaceae</i>                | 1.29 | 1.32 | [0.24 - 2.34]  |
|        | Lactic Acid Bacteria                     | 1.45 | 1.36 | [0.36 - 2.54]  |
|        | Total coliforms                          | 1.26 | 1.13 | [0.36 - 2.16]  |
|        | Sulfite-reducing <i>Clostridium</i> spp. | 0.25 | 0.42 | [-0.06 - 0.58] |
| Summer | Aerobic Mesophilic bacteria              | 2.36 | 2.07 | [0.02 - 4.70]  |
|        | <i>Enterobacteriaceae</i>                | 1.84 | 1.61 | [0.03 - 3.65]  |
|        | Lactic Acid Bacteria                     | ND   | ND   | ND             |
|        | Total coliforms                          | 1.64 | 1.49 | [0.54 - 3.32]  |
|        | Sulfite-reducing <i>Clostridium</i> spp. | 0.69 | 0.82 | [0.08 - 1.61]  |

\* ND: Not detected in the analyzed samples (<1 CFU/mL).

**Table S3.** Mean, standard deviation (S.D.) and 95 % confidence intervals (CFU/m<sup>3</sup>) for the aerobic mesophilic bacteria and molds and yeasts counts in environmental air samples in the analyzed processing areas.

| Sampling area     | Microorganism               | Mean | S.D. | 95 % C. I.    |
|-------------------|-----------------------------|------|------|---------------|
| Slaughtering area | Aerobic Mesophilic bacteria | 2.09 | 1.01 | [1.35 - 2.83] |
|                   | Molds and yeasts            | 1.18 | 0.69 | [0.67 - 1.68] |
| Gutting area      | Aerobic Mesophilic bacteria | 2.41 | 1.10 | [1.59 - 3.22] |
|                   | Molds and yeasts            | 1.20 | 0.93 | [0.51 - 1.88] |
| Packaging area    | Aerobic Mesophilic bacteria | 2.08 | 0.97 | [1.35 - 2.80] |
|                   | Molds and yeasts            | 0.94 | 0.83 | [0.33 - 1.54] |

**Table S4.** Mean, standard deviation (S.D.) and 95 % confidence intervals (CFU/m<sup>3</sup>) for the aerobic mesophilic bacteria and molds and yeasts counts in environmental air samples according to the seasonal variations.

| Season | Microorganism               | Mean | S.D. | 95 % C.I.   |
|--------|-----------------------------|------|------|-------------|
| Autumn | Aerobic mesophilic bacteria | 2.14 | 0.29 | [1.90-2.37] |
|        | Molds and yeasts            | 1.22 | 0.31 | [0.97-1.47] |
| Winter | Aerobic mesophilic bacteria | 1.31 | 1.43 | [0.16-2.46] |
|        | Molds and yeasts            | 0.43 | 0.50 | [0.02-0.84] |
| Spring | Aerobic mesophilic bacteria | 2.83 | 0.33 | [2.58-3.08] |
|        | Molds and yeasts            | 1.19 | 1.00 | [0.39-1.99] |
| Summer | Aerobic mesophilic bacteria | 2.79 | 0.25 | [2.52-3.06] |
|        | Molds and yeasts            | 2.07 | 0.11 | [1.95-2.19] |

**Table S5.** Mean, standard deviation (S.D.) and 95 % confidence intervals (log CFU/cm<sup>2</sup>) for the aerobic mesophilic bacteria, coliforms, *Enterobacteriaceae*, coagulase-positive *Staphylococcus* spp. counts in food-contact surfaces samples in the analyzed processing areas.

| Sampling area     | Microorganism                                 | Mean    | S.D. | 95 % C.I.      |
|-------------------|-----------------------------------------------|---------|------|----------------|
| Slaughtering bath | Aerobic mesophilic bacteria                   | 1.96    | 1.49 | [1.30 - 2.62]  |
|                   | Coliforms                                     | 1.01    | 0.57 | [0.23 - 1.79]  |
|                   | <i>Enterobacteriaceae</i>                     | 0.60    | 1.27 | [0.44 - 0.76]  |
|                   | Coagulase-positive <i>Staphylococcus</i> spp. | 0.06    | 1.27 | [-0.88- 0.61]  |
| Washing belt      | Aerobic mesophilic bacteria                   | 1.2     | 0.96 | [0.50 -1.90]   |
|                   | Coliforms                                     | -0.35 * | 0.91 | [-1.02 - 0.31] |
|                   | <i>Enterobacteriaceae</i>                     | -0.29 * | 0.42 | [-0.60 - 0.02] |
|                   | Coagulase-positive <i>Staphylococcus</i> spp. | 0.07    | 0.2  | [-0.07 - 0.21] |
| Gutting machine   | Aerobic mesophilic bacteria                   | 1.83    | 1.45 | [0.76 - 2.90]  |
|                   | Coliforms                                     | 0.71    | 0.99 | [-0.02 - 1.43] |
|                   | <i>Enterobacteriaceae</i>                     | 0.84    | 0.94 | [0.14 - 1.54]  |
|                   | Coagulase-positive <i>Staphylococcus</i> spp. | 0.24    | 0.96 | [-0.47 - 0.94] |
| Knife             | Aerobic mesophilic bacteria                   | 0.76    | 1.51 | [-0.35 - 1.87] |
|                   | Coliforms                                     | 0.30    | 0.70 | [-0.21 - 0.81] |
|                   | <i>Enterobacteriaceae</i>                     | 0.08    | 0.21 | [-0.08 - 0.24] |

|                               |                                               |      |      |                |
|-------------------------------|-----------------------------------------------|------|------|----------------|
|                               | Coagulase-positive <i>Staphylococcus</i> spp. | ND * | ND   | ND             |
| Worker hands                  | Aerobic mesophilic bacteria                   | 1.23 | 0.92 | [0.55 - 1.91]  |
|                               | Coliforms                                     | 0.12 | 0.3  | [-0.10 - 0.35] |
|                               | <i>Enterobacteriaceae</i>                     | 0.13 | 0.34 | [-0.12 - 0.38] |
|                               | Coagulase-positive <i>Staphylococcus</i> spp. | 0.25 | 1.13 | [0.59 - 1.09]  |
| Packaging belt                | Aerobic mesophilic bacteria                   | 0.86 | 0.89 | [0.20 - 1.52]  |
|                               | Coliforms                                     | 0.74 | 1.06 | [-0.05 - 1.52] |
|                               | <i>Enterobacteriaceae</i>                     | 0.08 | 0.21 | [-0.08 - 0.24] |
|                               | Coagulase-positive <i>Staphylococcus</i> spp. | 0.37 | 0.74 | [-0.18 - 0.92] |
| Filleting machine             | Aerobic mesophilic bacteria                   | 0.91 | 0.95 | [0.21 - 1.61]  |
|                               | Coliforms                                     | 0.23 | 0.73 | [-0.31 - 0.78] |
|                               | <i>Enterobacteriaceae</i>                     | 0.57 | 1.21 | [-0.33 - 1.47] |
|                               | Coagulase-positive <i>Staphylococcus</i> spp. | 0.09 | 0.24 | [-0.09 - 0.27] |
| Packaging box                 | Aerobic mesophilic bacteria                   | 1.08 | 1.39 | [0.07 - 2.09]  |
|                               | Coliforms                                     | 0.04 | 0.11 | [-0.04 - 0.12] |
|                               | <i>Enterobacteriaceae</i>                     | ND   | ND   | ND             |
|                               | Coagulase-positive <i>Staphylococcus</i> spp. | ND   | ND   | ND             |
| Packaged fillet conveyor belt | Aerobic mesophilic bacteria                   | 0.86 | 0.89 | [0.20 - 1.52]  |
|                               | Coliforms                                     | 0.74 | 0.74 | [0.19 - 1.52]  |
|                               | <i>Enterobacteriaceae</i>                     | 0.08 | 0.08 | [0.02 - 0.24]  |
|                               | Coagulase-positive <i>Staphylococcus</i> spp. | 0.37 | 0.37 | [0.10 - 0.92]  |

ND \*: Not detected (< 1 CFU/cm<sup>2</sup>).

\* The results expressed as “ \* ” were below the detection limit of the technique applied for enumeration in each case.

**Table S6.** Mean, standard deviation (S.D.) and (95 %) confidence intervals (log CFU/ cm<sup>2</sup>) for the aerobic mesophilic bacteria, coliforms, *Enterobacteriaceae*, coagulase-positive *Staphylococcus* spp. counts in FCS samples in the analyzed processing areas according to the seasons of the year.

| Season | Microorganism                                 | Mean  | S.D. | 95 % C.I.      |
|--------|-----------------------------------------------|-------|------|----------------|
| Autumn | Mesophilic bacteria                           | 2.04  | 1.42 | [1.40 - 2.68]  |
|        | Coliforms                                     | 0.59  | 0.87 | [0.20 - 0.98]  |
|        | <i>Enterobacteriaceae</i>                     | 0.39  | 0.75 | [0.04 - 0.74]  |
|        | Coagulase-positive <i>Staphylococcus</i> spp. | 0.24  | 0.59 | [-0.03 - 0.51] |
| Winter | Mesophilic bacteria                           | 0.89  | 1.2  | [0.34 - 1.44]  |
|        | Coliforms                                     | 0.30  | 0.64 | [0.01 - 0.59]  |
|        | <i>Enterobacteriaceae</i>                     | 0.25  | 0.66 | [-0.06 - 0.56] |
|        | Coagulase-positive <i>Staphylococcus</i> spp. | 0.07  | 0.28 | [-0.07 - 0.21] |
| Spring | Mesophilic bacteria                           | 0.78  | 1.23 | [0.21 - 1.35]  |
|        | Coliforms                                     | 0.16  | 0.8  | [-0.21 - 0.53] |
|        | <i>Enterobacteriaceae</i>                     | 0.03  | 0.82 | [-0.34 - 0.40] |
|        | Coagulase-positive <i>Staphylococcus</i> spp. | -0.12 | 1.11 | [-0.63 - 0.39] |
| Summer | Mesophilic bacteria                           | 1.16  | 0.86 | [0.59 - 1.73]  |
|        | Coliforms                                     | 0.1   | 1.14 | [-0.64 - 0.84] |
|        | <i>Enterobacteriaceae</i>                     | 0.35  | 0.71 | [-0.12 - 0.82] |
|        | Coagulase-positive <i>Staphylococcus</i> spp. | 0.68  | 0.96 | [0.06 - 1.30]  |

**Table S7.** Molecular identification (16S rRNA gene PCR) of the 98 isolates selected based on visits to the industry (I – VII), category (water, food contact surfaces and rainbow trout) and type of sample of each category.

| Visit No. | Category | Sample type           | Isolated ID | * Identified species/genus      | Family             | Order            | Query Leng (bp) | Query ID | Max Score | Total Score | Per. Query Cover (%) | E value | Per. Ident (%) | Accession Number (NCBI GenBank) |
|-----------|----------|-----------------------|-------------|---------------------------------|--------------------|------------------|-----------------|----------|-----------|-------------|----------------------|---------|----------------|---------------------------------|
| I         | Water    | Input water           | 1           | <i>Citrobacter gillenii</i>     | Enterobacteriaceae | Enterobacterales | 739             | 60321    | 1365      | 1365        | 100                  | 0.0     | 100,00         | gi 1751390857 MN513228.1        |
| I         | Water    | Input water           | 12          | <i>Hafnia paralvei</i>          | Hafniaceae         | Enterobacterales | 819             | 452003   | 1513      | 11958       | 100                  | 0.0     | 100,00         | gi 1344462186 CP014031.2        |
| I         | Water    | Output water          | 5           | <i>Citrobacter gillenii</i>     | Enterobacteriaceae | Enterobacterales | 749             | 378843   | 1378      | 1378        | 100                  | 0.0     | 99,87          | gi 1751390857 MN513228.1        |
| I         | Product  | Flesh                 | 20          | <i>Citrobacter freundii</i>     | Enterobacteriaceae | Enterobacterales | 659             | 24609    | 1218      | 9744        | 100                  | 0.0     | 100,00         | gi 1615107120 CP038856.1        |
| I         | Product  | Viscera               | 18          | <i>Citrobacter freundii</i>     | Enterobacteriaceae | Enterobacterales | 679             | 222855   | 1254      | 1254        | 100                  | 0.0     | 100,00         | gi 1767042976 MN582981.1        |
| I         | Surfaces | Gutting machine       | 15          | <i>Hafnia paralvei</i>          | Hafniaceae         | Enterobacterales | 729             | 495443   | 1341      | 1341        | 100                  | 0.0     | 99,86          | gi 1207851012 KY849249.1        |
| I         | Surfaces | Gutting machine       | 22          | <i>Hafnia paralvei</i>          | Hafniaceae         | Enterobacterales | 649             | 42343    | 1199      | 1199        | 100                  | 0.0     | 100,00         | gi 1370745659 MH119676.1        |
| I         | Surfaces | Packaged fillets belt | 21          | <i>Providencia rustigianii</i>  | Morganellaceae     | Enterobacterales | 649             | 15431    | 1199      | 8325        | 100                  | 0.0     | 100,00         | gi 1539485721 LR134189.1        |
| II        | Product  | Flesh                 | 17          | <i>Staphylococcus warneri</i>   | Staphylococcaceae  | Bacillales       | 699             | 24661    | 1291      | 1291        | 100                  | 0.0     | 100,00         | gi 1859633578 MT642942.1        |
| II        | Product  | Viscera               | 16          | <i>Enterobacter sp.</i>         | Enterobacteriaceae | Enterobacterales | 719             | 40339    | 1328      | 1328        | 100                  | 0.0     | 100,00         | gi 1434133245 MH669333.1        |
| II        | Surfaces | Worker hands          | 6           | <i>Staphylococcus warneri</i>   | Staphylococcaceae  | Bacillales       | 769             | 61399    | 1421      | 1421        | 100                  | 0.0     | 100,00         | gi 1859633578 MT642942.1        |
| III       | Surfaces | Packaging belt        | 8           | <i>Staphylococcus aureus</i>    | Staphylococcaceae  | Bacillales       | 819             | 62179    | 1513      | 9027        | 100                  | 0.0     | 100,00         | gi 2032998575 CP071943.1        |
| III       | Surfaces | Packaging belt        | 9           | <i>Macrococcus caseolyticus</i> | Staphylococcaceae  | Bacillales       | 869             | 112043   | 1605      | 1605        | 100                  | 0.0     | 100,00         | gi 1822211978 MT225659.1        |
| III       | Surfaces | Packaged fillets belt | 11          | <i>Staphylococcus aureus</i>    | Staphylococcaceae  | Bacillales       | 869             | 46643    | 1605      | 1605        | 100                  | 0.0     | 100,00         | gi 2032998575 CP071943.1        |
| IV        | Water    | Input water           | 27          | <i>Serratia marcescens</i>      | Yersiniaceae       | Enterobacterales | 949             | 24137    | 1753      | 12225       | 100                  | 0.0     | 100,00         | gi 1860418725 CP055161.1        |
| IV        | Water    | Output water          | 28          | <i>Enterococcus sp</i>          | Enterococcaceae    | Lactobacillales  | 1179            | 45869    | 2178      | 2178        | 100                  | 0.0     | 100,00         | gi 2103567986 OK326653.1        |
| IV        | Product  | Flesh                 | 9           | <i>Citrobacter gillenii</i>     | Enterobacteriaceae | Enterobacterales | 937             | 63393    | 1725      | 1725        | 100                  | 0.0     | 99,89          | gi 1311515739 MG675590.1        |
| IV        | Product  | Flesh                 | 14          | <i>Staphylococcus sp</i>        | Staphylococcaceae  | Bacillales       | 951             | 61843    | 1746      | 1746        | 100                  | 0.0     | 99,79          | gi 1359912432 MH057213.1        |
| IV        | Product  | Flesh                 | 15          | <i>Staphylococcus warneri</i>   | Staphylococcaceae  | Bacillales       | 1090            | 36033    | 2013      | 2013        | 100                  | 0.0     | 100,00         | gi 1840136874 MT448999.1        |
| IV        | Product  | Flesh                 | 16          | <i>Staphylococcus warneri</i>   | Staphylococcaceae  | Bacillales       | 971             | 6373     | 1794      | 1794        | 100                  | 0.0     | 100,00         | gi 1859633578 MT642942.1        |
| IV        | Product  | Flesh                 | 17          | <i>Staphylococcus hominis</i>   | Staphylococcaceae  | Bacillales       | 973             | 61815    | 1797      | 1797        | 100                  | 0.0     | 100,00         | gi 1851774560 MT585539.1        |
| IV        | Product  | Viscera               | 1           | <i>Lactococcus lactis</i>       | Streptococcaceae   | Lactobacillales  | 901             | 59401    | 1664      | 1664        | 100                  | 0.0     | 100,00         | gi 1743123904 MN466963.1        |
| IV        | Product  | Viscera               | 2           | <i>Lactococcus lactis</i>       | Streptococcaceae   | Lactobacillales  | 1088            | 4879     | 1989      | 1989        | 100                  | 0.0     | 99,91          | gi 1743123904 MN466963.1        |
| IV        | Product  | Viscera               | 3           | <i>Lactococcus lactis</i>       | Streptococcaceae   | Lactobacillales  | 354             | 19409    | 654       | 654         | 100                  | 0.0     | 100,00         | gi 1843990348 MT498452.1        |

|    |          |                       |    |                                 |                           |                         |      |        |      |       |     |     |        |                          |
|----|----------|-----------------------|----|---------------------------------|---------------------------|-------------------------|------|--------|------|-------|-----|-----|--------|--------------------------|
| IV | Product  | Viscera               | 4  | <i>Staphylococcus epidermis</i> | <i>Staphylococcaceae</i>  | <i>Bacillales</i>       | 970  | 27371  | 1792 | 1792  | 100 | 0.0 | 100,00 | gi 2105350976 OK355385.1 |
| IV | Product  | Viscera               | 5  | <i>Lactococcus lactis</i>       | <i>Streptococcaceae</i>   | <i>Lactobacillales</i>  | 1078 | 535463 | 2059 | 2059  | 100 | 0.0 | 99,91  | gi 1852325286 MT597705.1 |
| IV | Product  | Viscera               | 7  | <i>Lactococcus cremoris</i>     | <i>Streptococcaceae</i>   | <i>Lactobacillales</i>  | 1129 | 51855  | 2067 | 12405 | 100 | 0.0 | 99,65  | gi 1834244649 CP051518.1 |
| IV | Product  | Viscera               | 8  | <i>Lactococcus cremoris</i>     | <i>Streptococcaceae</i>   | <i>Lactobacillales</i>  | 1248 | 58791  | 2213 | 13280 | 99  | 0.0 | 98,57  | gi 1834244649 CP051518.1 |
| IV | Product  | Viscera               | 8b | <i>Lactococcus cremoris</i>     | <i>Streptococcaceae</i>   | <i>Lactobacillales</i>  | 1182 | 34945  | 2145 | 12870 | 99  | 0.0 | 99,33  | gi 1834244649 CP051518.1 |
| IV | Product  | Viscera               | 11 | <i>Citrobacter gillenii</i>     | <i>Enterobacteriaceae</i> | <i>Enterobacterales</i> | 978  | 5265   | 1807 | 1807  | 100 | 0.0 | 100,00 | gi 1707325058 MN197983.1 |
| IV | Product  | Viscera               | 12 | <i>Citrobacter freundii</i>     | <i>Enterobacteriaceae</i> | <i>Enterobacterales</i> | 1080 | 59783  | 1995 | 15964 | 100 | 0.0 | 100,00 | gi 1881832576 CP057509.  |
| IV | Product  | Viscera               | 13 | <i>Citrobacter sp</i>           | <i>Enterobacteriaceae</i> | <i>Enterobacterales</i> | 980  | 49097  | 1790 | 1790  | 99  | 0.0 | 99,69  | gi 1707325058 MN197983.1 |
| IV | Surfaces | Gutting machine       | 18 | <i>Providencia rustigianii</i>  | <i>Morganellaceae</i>     | <i>Enterobacterales</i> | 889  | 1519   | 1637 | 1637  | 100 | 0.0 | 99,89  | gi 2077896939 MZ734440.1 |
| IV | Surfaces | Gutting machine       | 24 | <i>Shewanella sp</i>            | <i>Shewanellaceae</i>     | <i>Alteromonadales</i>  | 1028 | 39665  | 1899 | 16810 | 100 | 0.0 | 100,00 | gi 1356669658 CP022089.2 |
| IV | Surfaces | Knife                 | 19 | <i>Morganella morganii</i>      | <i>Enterobacteriaceae</i> | <i>Enterobacterales</i> | 1009 | 31517  | 1858 | 1858  | 100 | 0.0 | 99,90  | gi 1779076118 MN744697.1 |
| IV | Surfaces | Slaughter             | 20 | <i>Citrobacter sp</i>           | <i>Enterobacteriaceae</i> | <i>Enterobacterales</i> | 1345 | 19785  | 2172 | 17382 | 93  | 0.0 | 97,50  | gi 1615107120 CP038856.1 |
| IV | Surfaces | Packaged fillets belt | 21 | <i>Kluyvera sp</i>              | <i>Enterobacteriaceae</i> | <i>Enterobacterales</i> | 939  | 49157  | 1712 | 1712  | 100 | 0.0 | 99,57  | gi 1826706563 MT263028.1 |
| IV | Surfaces | Packaged fillets belt | 25 | <i>Macrococcus caseolyticus</i> | <i>Staphylococcaceae</i>  | <i>Bacillales</i>       | 1076 | 53417  | 1965 | 1965  | 99  | 0.0 | 99,63  | gi 1682060885 MN062068.1 |
| IV | Surfaces | Clean box             | 22 | <i>Klebsiella sp</i>            | <i>Enterobacteriaceae</i> | <i>Enterobacterales</i> | 1360 | 49735  | 2163 | 2163  | 91  | 0.0 | 97,70  | gi 1782828319 MN812670.1 |
| IV | Surfaces | Packaging belt        | 23 | <i>Citrobacter freundii</i>     | <i>Enterobacteriaceae</i> | <i>Enterobacterales</i> | 1008 | 6417   | 1851 | 14811 | 100 | 0.0 | 99,80  | gi 1615107120 CP038856.1 |
| IV | Surfaces | Packaging belt        | 26 | <i>Macrococcus caseolyticus</i> | <i>Staphylococcaceae</i>  | <i>Bacillales</i>       | 978  | 45319  | 1794 | 1794  | 100 | 0.0 | 99,80  | gi 1725274959 MK443060.1 |
| VI | Water    | Input water           | 4  | <i>Enterobacter ludwigii</i>    | <i>Enterobacteriaceae</i> | <i>Enterobacterales</i> | 1004 | 619    | 1855 | 1855  | 100 | 0   | 100,00 | gi 688474302 KJ850208.1  |
| VI | Water    | Input water           | 5  | <i>Escherichia coli</i>         | <i>Enterobacteriaceae</i> | <i>Enterobacterales</i> | 1079 | 378623 | 1980 | 13831 | 100 | 0   | 99,81  | gi 1836698516 CP052057.1 |
| VI | Water    | Input water           | 18 | <i>Citrobacter gillenii</i>     | <i>Enterobacteriaceae</i> | <i>Enterobacterales</i> | 999  | 26655  | 1845 | 1845  | 100 | 0   | 100,00 | gi 1751390857 MN513228.1 |
| VI | Water    | Input water           | 19 | <i>Enterobacter ludwigii</i>    | <i>Enterobacteriaceae</i> | <i>Enterobacterales</i> | 1026 | 35323  | 1888 | 15012 | 99  | 0   | 99,90  | gi 1822110488 CP039741.1 |
| VI | Water    | Output water          | 6  | <i>Hafnia alvei</i>             | <i>Hafniaceae</i>         | <i>Enterobacterales</i> | 973  | 50197  | 1797 | 1797  | 100 | 0.0 | 100,00 | gi 1830434209 MT323144.1 |
| VI | Water    | Output water          | 7  | <i>Hafnia paralvei</i>          | <i>Hafniaceae</i>         | <i>Enterobacterales</i> | 896  | 34483  | 1644 | 13062 | 100 | 0   | 99,89  | gi 1344462186 CP014031.2 |
| VI | Water    | Output water          | 8  | <i>Citrobacter gillenii</i>     | <i>Enterobacteriaceae</i> | <i>Enterobacterales</i> | 1008 | 48747  | 1862 | 1862  | 100 | 0   | 100,00 | gi 2088097036 MZ964583.1 |
| VI | Water    | Output water          | 9  | <i>Hafnia paralvei</i>          | <i>Hafniaceae</i>         | <i>Enterobacterales</i> | 1015 | 21105  | 1873 | 1873  | 99  | 0   | 100,00 | gi 1517398458 MG996519.1 |
| VI | Water    | Output water          | 14 | <i>Enterobacter ludwigii</i>    | <i>Enterobacteriaceae</i> | <i>Enterobacterales</i> | 969  | 52883  | 1784 | 14185 | 100 | 0   | 99,90  | gi 1822110488 CP039741.1 |
| VI | Product  | Flesh                 | RB | <i>Pseudomonas laurentiana</i>  | <i>Pseudomonadaceae</i>   | <i>Pseudomonadales</i>  | 739  | 15689  | 1365 | 1365  | 100 | 0.0 | 100,00 | gi 1858593063 MT626819.1 |
| VI | Product  | Flesh                 | RC | <i>Pseudomonas gessardii</i>    | <i>Pseudomonadaceae</i>   | <i>Pseudomonadales</i>  | 951  | 36699  | 1753 | 1753  | 99  | 0.0 | 100,00 | gi 1858593069 MT626825.1 |

|     |          |                   |     |                                 |                           |                         |      |       |      |       |     |     |        |                          |
|-----|----------|-------------------|-----|---------------------------------|---------------------------|-------------------------|------|-------|------|-------|-----|-----|--------|--------------------------|
| VI  | Product  | Viscera           | RD  | <i>Aeromonas media</i>          | <i>Aeromonadaceae</i>     | <i>Aeromonadales</i>    | 882  | 5405  | 1629 | 16276 | 100 | 0.0 | 100,00 | gi 1841681316 CP038441.1 |
| VI  | Product  | Viscera           | McE | <i>Aeromonas sp.</i>            | <i>Aeromonadaceae</i>     | <i>Aeromonadales</i>    | 933  | 65095 | 1714 | 1714  | 100 | 0.0 | 99,79  | gi 1835439075 MT396438.1 |
| VI  | Surfaces | Wash tape         | 1   | <i>Hafnia paralvei</i>          | <i>Hafniaceae</i>         | <i>Enterobacterales</i> | 878  | 10123 | 1622 | 12874 | 100 | 0   | 100,00 | gi 1344462186 CP014031.2 |
| VI  | Surfaces | Wash tape         | 10  | <i>Exiguobacterium sp.</i>      | <i>Bacillaceae</i>        | <i>Bacillales</i>       | 974  | 53313 | 1796 | 1796  | 99  | 0   | 100,00 | gi 1041495566 KU758895.1 |
| VI  | Surfaces | Wash tape         | 12  | <i>Staphylococcus aureus</i>    | <i>Staphylococcaceae</i>  | <i>Bacillales</i>       | 974  | 60795 | 1799 | 1799  | 100 | 0   | 100,00 | gi 2222591213 ON222796.1 |
| VI  | Surfaces | Gutting machine   | 2   | <i>Hafnia paralvei</i>          | <i>Hafniaceae</i>         | <i>Enterobacterales</i> | 995  | 19251 | 1838 | 14558 | 100 | 0   | 100,00 | gi 1344462186 CP014031.2 |
| VI  | Surfaces | Gutting machine   | 15  | <i>Pseudomonas psychrophila</i> | <i>Pseudomonadaceae</i>   | <i>Pseudomonadales</i>  | 1027 | 39523 | 1892 | 1892  | 100 | 0   | 99,90  | gi 1772803573 LC508010.1 |
| VI  | Surfaces | Gutting machine   | 16  | <i>Pseudomonas psychrophila</i> | <i>Pseudomonadaceae</i>   | <i>Pseudomonadales</i>  | 1136 | 20427 | 2093 | 2093  | 100 | 0   | 99,91  | gi 1772803573 LC508010.1 |
| VI  | Surfaces | Slaughter         | 3   | <i>Hafnia paralvei</i>          | <i>Hafniaceae</i>         | <i>Enterobacterales</i> | 1010 | 17213 | 1866 | 14824 | 100 | 0   | 100,00 | gi 1344462186 CP014031.2 |
| VI  | Surfaces | Filleting machine | 17  | <i>Citrobacter gillenii</i>     | <i>Enterobacteriaceae</i> | <i>Enterobacterales</i> | 959  | 17365 | 1772 | 1772  | 100 | 0   | 100,00 | gi 1311515739 MG675590.1 |
| VII | Water    | Input water       | 5   | <i>Pseudomonas aeruginosa</i>   | <i>Pseudomonadaceae</i>   | <i>Pseudomonadales</i>  | 945  | 41647 | 1746 | 1746  | 100 | 0.0 | 100,00 | gi 1722681544 MN309895.1 |
| VII | Water    | Input water       | 7   | <i>Escherichia fergusonii</i>   | <i>Enterobacteriaceae</i> | <i>Enterobacterales</i> | 956  | 63823 | 1718 | 1718  | 97  | 0.0 | 99,89  | gi 1836146575 MT416422.1 |
| VII | Water    | Input water       | 8   | <i>Serratia marcescens</i>      | <i>Yersiniaceae</i>       | <i>Enterobacterales</i> | 865  | 22757 | 1592 | 11100 | 100 | 0.0 | 99,88  | gi 1860418725 CP055161.1 |
| VII | Water    | Input water       | 13  | <i>Escherichia coli</i>         | <i>Enterobacteriaceae</i> | <i>Enterobacterales</i> | 906  | 12611 | 1670 | 11665 | 99  | 0.0 | 100,00 | gi 2249798319 CP098214.1 |
| VII | Water    | Output water      | 1   | <i>Lactococcus garvieae</i>     | <i>Streptococcaceae</i>   | <i>Lactobacillales</i>  | 922  | 29985 | 1698 | 1698  | 99  | 0.0 | 100,00 | gi 1852867376 MT604772.1 |
| VII | Water    | Output water      | 2   | <i>Enterococcus hirae</i>       | <i>Enterococcaceae</i>    | <i>Lactobacillales</i>  | 933  | 62895 | 1718 | 10311 | 100 | 0.0 | 99,89  | gi 1861262708 CP055232.1 |
| VII | Water    | Output water      | 3   | <i>Exiguobacterium undae</i>    | <i>Bacillaceae</i>        | <i>Bacillales</i>       | 946  | 20995 | 1748 | 1748  | 100 | 0.0 | 100,00 | gi 1605306739 MK414802.1 |
| VII | Water    | Output water      | 4   | <i>Pseudomonas aeruginosa</i>   | <i>Pseudomonadaceae</i>   | <i>Pseudomonadales</i>  | 957  | 56125 | 1768 | 1768  | 100 | 0.0 | 100,00 | gi 1723195072 MN314670.1 |
| VII | Water    | Output water      | 9   | <i>Escherichia coli</i>         | <i>Enterobacteriaceae</i> | <i>Enterobacterales</i> | 915  | 34261 | 1690 | 11780 | 100 | 0.0 | 100,00 | gi 2244114683 OW968111.1 |
| VII | Water    | Output water      | 10  | <i>Serratia marcescens</i>      | <i>Yersiniaceae</i>       | <i>Enterobacterales</i> | 729  | 43779 | 1321 | 1321  | 100 | 0.0 | 99,31  | gi 1908124013 MW031836.1 |
| VII | Water    | Output water      | 11  | <i>Citrobacter arsenatis</i>    | <i>Enterobacteriaceae</i> | <i>Enterobacterales</i> | 678  | 19843 | 1242 | 1242  | 100 | 0.0 | 99,71  | gi 1531243458 MK262983.1 |
| VII | Water    | Output water      | 12  | <i>Hafnia paralvei</i>          | <i>Hafniaceae</i>         | <i>Enterobacterales</i> | 931  | 28279 | 1720 | 13657 | 100 | 0.0 | 100,00 | gi 1344462186 CP014031.2 |
| VII | Product  | Flesh             | 28  | <i>Hafnia alvei</i>             | <i>Hafniaceae</i>         | <i>Enterobacterales</i> | 1006 | 64181 | 1851 | 1851  | 99  | 0   | 99,90  | gi 1535530918 MK294248.1 |
| VII | Product  | Flesh             | 29  | <i>Providencia rettgeri</i>     | <i>Morganellaceae</i>     | <i>Enterobacterales</i> | 1141 | 3681  | 2098 | 14625 | 99  | 0   | 99,91  | gi 827747822 KR919605.1  |
| VII | Product  | Flesh             | 30  | <i>Citrobacter freundii</i>     | <i>Enterobacteriaceae</i> | <i>Enterobacterales</i> | 960  | 29345 | 1766 | 1766  | 100 | 0   | 99,90  | gi 731188935 KM507607.1  |
| VII | Product  | Flesh             | 31  | <i>Hafnia paralvei</i>          | <i>Hafniaceae</i>         | <i>Enterobacterales</i> | 1012 | 58529 | 1869 | 14809 | 100 | 0   | 100,00 | gi 731188935 KM507607.1  |
| VII | Product  | Flesh             | 32  | <i>Hafnia sp.</i>               | <i>Hafniaceae</i>         | <i>Enterobacterales</i> | 1014 | 44831 | 1862 | 1862  | 100 | 0   | 99,80  | gi 1850169240 MT573107.1 |
| VII | Product  | Flesh             | 33  | <i>Hafnia sp.</i>               | <i>Hafniaceae</i>         | <i>Enterobacterales</i> | 1004 | 36145 | 1855 | 1855  | 100 | 0   | 100,00 | gi 1493570076 MK070120.1 |

|     |          |                   |    |                                  |                           |                         |      |        |      |       |     |     |        |                          |
|-----|----------|-------------------|----|----------------------------------|---------------------------|-------------------------|------|--------|------|-------|-----|-----|--------|--------------------------|
| VII | Product  | Flesh             | 35 | <i>Enterobacter</i> sp.          | <i>Enterobacteriaceae</i> | <i>Enterobacterales</i> | 958  | 201173 | 1764 | 1764  | 100 | 0   | 99,90  | gi 1229082282 MF370900.1 |
| VII | Product  | Flesh             | 36 | <i>Enterobacter cloacae</i>      | <i>Enterobacteriaceae</i> | <i>Enterobacterales</i> | 1014 | 15853  | 1873 | 1873  | 100 | 0   | 100,00 | gi 1509786937 MH769021.1 |
| VII | Product  | Flesh             | 37 | <i>Citrobacter gillenii</i>      | <i>Enterobacteriaceae</i> | <i>Enterobacterales</i> | 1000 | 65015  | 1847 | 1847  | 100 | 0   | 100,00 | gi 1751390857 MN513228.1 |
| VII | Product  | Flesh             | 41 | <i>Lactococcus garvieae</i>      | <i>Streptococcaceae</i>   | <i>Lactobacillales</i>  | 1041 | 51763  | 1923 | 1923  | 100 | 0   | 100,00 | gi 1434131720 MH669171.1 |
| VII | Product  | Flesh             | 42 | <i>Lactococcus garvieae</i>      | <i>Streptococcaceae</i>   | <i>Lactobacillales</i>  | 949  | 52139  | 1753 | 1753  | 100 | 0   | 100,00 | gi 2058478868 CP077317.1 |
| VII | Product  | Viscera           | 34 | <i>Kluyvera intermedia</i>       | <i>Enterobacteriaceae</i> | <i>Enterobacterales</i> | 885  | 55375  | 1628 | 13024 | 100 | 0   | 99,89  | gi 1344462186 CP014031.2 |
| VII | Product  | Viscera           | 38 | <i>Lactococcus cremoris</i>      | <i>Streptococcaceae</i>   | <i>Lactobacillales</i>  | 959  | 15051  | 1772 | 1772  | 100 | 0   | 100,00 | gi 1344462186 CP014031.2 |
| VII | Surfaces | Slaughter         | 15 | <i>Shewanella seohaensis</i>     | <i>Shewanellaceae</i>     | <i>Alteromonadales</i>  | 920  | 30007  | 1700 | 1700  | 100 | 0.0 | 100,00 | gi 1767042976 MN582981.1 |
| VII | Surfaces | Slaughter         | 19 | <i>Brevibacterium</i> sp.        | <i>Brevibacteriaceae</i>  | <i>Actinomycetales</i>  | 922  | 4299   | 1692 | 1692  | 100 | 0.0 | 99,78  | gi 1434131730 MH669181.1 |
| VII | Surfaces | Slaughter         | 21 | <i>Erwinia</i> sp.               | <i>Erwiniaceae</i>        | <i>Enterobacterales</i> | 914  | 23641  | 1687 | 1687  | 99  | 0.0 | 100,00 | gi 1434172748 MH671652.1 |
| VII | Surfaces | Slaughter         | 22 | <i>Hafnia paralvei</i>           | <i>Hafniaceae</i>         | <i>Enterobacterales</i> | 916  | 19647  | 1687 | 13336 | 100 | 0.0 | 99,89  | gi 1835259294 MT386196.1 |
| VII | Surfaces | Slaughter         | 24 | <i>Pantoea</i> sp.               | <i>Erwiniaceae</i>        | <i>Enterobacterales</i> | 624  | 54827  | 1118 | 1118  | 100 | 0.0 | 98,88  | gi 1847518191 MT544710.1 |
| VII | Surfaces | Worker hands      | 20 | <i>Staphylococcus warneri</i>    | <i>Staphylococcaceae</i>  | <i>Bacillales</i>       | 902  | 53013  | 1661 | 1661  | 100 | 0.0 | 99,89  | gi 1774529443 CP045843.1 |
| VII | Surfaces | Filleting machine | 16 | <i>Lysinibacillus sphaericus</i> | <i>Bacillaceae</i>        | <i>Bacillales</i>       | 918  | 10627  | 1687 | 1687  | 99  | 0.0 | 99,89  | gi 1344462186 CP014031.2 |
| VII | Surfaces | Filleting machine | 18 | <i>Brevibacterium</i> sp.        | <i>Brevibacteriaceae</i>  | <i>Actinomycetales</i>  | 923  | 62703  | 1683 | 1683  | 100 | 0.0 | 99,57  | gi 1434131712 MH669163.1 |
| VII | Surfaces | Filleting machine | 23 | <i>Providencia alcalifaciens</i> | <i>Morganellaceae</i>     | <i>Enterobacterales</i> | 923  | 7245   | 1703 | 1703  | 99  | 0.0 | 100,00 | gi 1311515739 MG675590.1 |
| VII | Surfaces | Filleting machine | 26 | <i>Citrobacter gillenii</i>      | <i>Enterobacteriaceae</i> | <i>Enterobacterales</i> | 903  | 6821   | 1668 | 1668  | 100 | 0.0 | 100,00 | gi 1852867376 MT604772.1 |
| VII | Surfaces | Filleting machine | 27 | <i>Hafnia paralvei</i>           | <i>Hafniaceae</i>         | <i>Enterobacterales</i> | 917  | 45995  | 1688 | 13351 | 100 | 0.0 | 99,89  | gi 1855411423 MT611574.1 |

<sup>a</sup> Closest related species found in the NCBI GenBank database.
